# Supplementary material
Source: PubMed Central journal article supplement (PMC3045007)
Supplement: supp_M110.155895_jbc.M110.155895-1.pdf [file supp_M110.155895_jbc.M110.155895-1.pdf]

# Figure S1

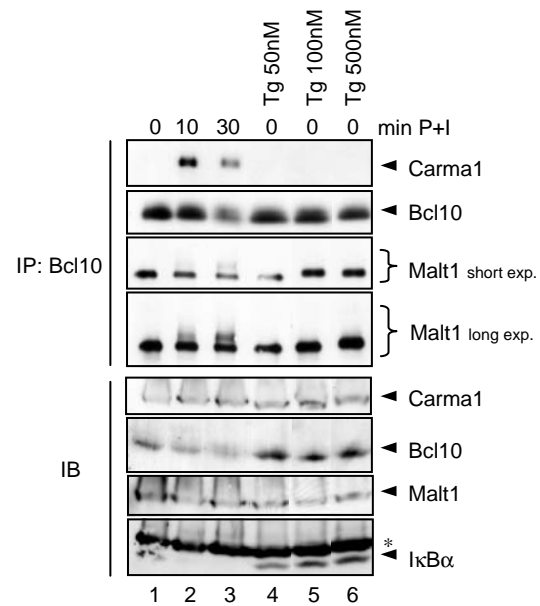

***Figure S1: Thapsigargin treatment is not sufficient to induce CBM-complex assembly***

Jurkat T cells were either left untreated, were stimulated with PMA+ionomycin or were treated with the indicated concentrations of thapsigargin for 60 minutes. Subsequently, an anti-Bcl10 immunoprecipitation analysis was performed. \* unspecific signal.

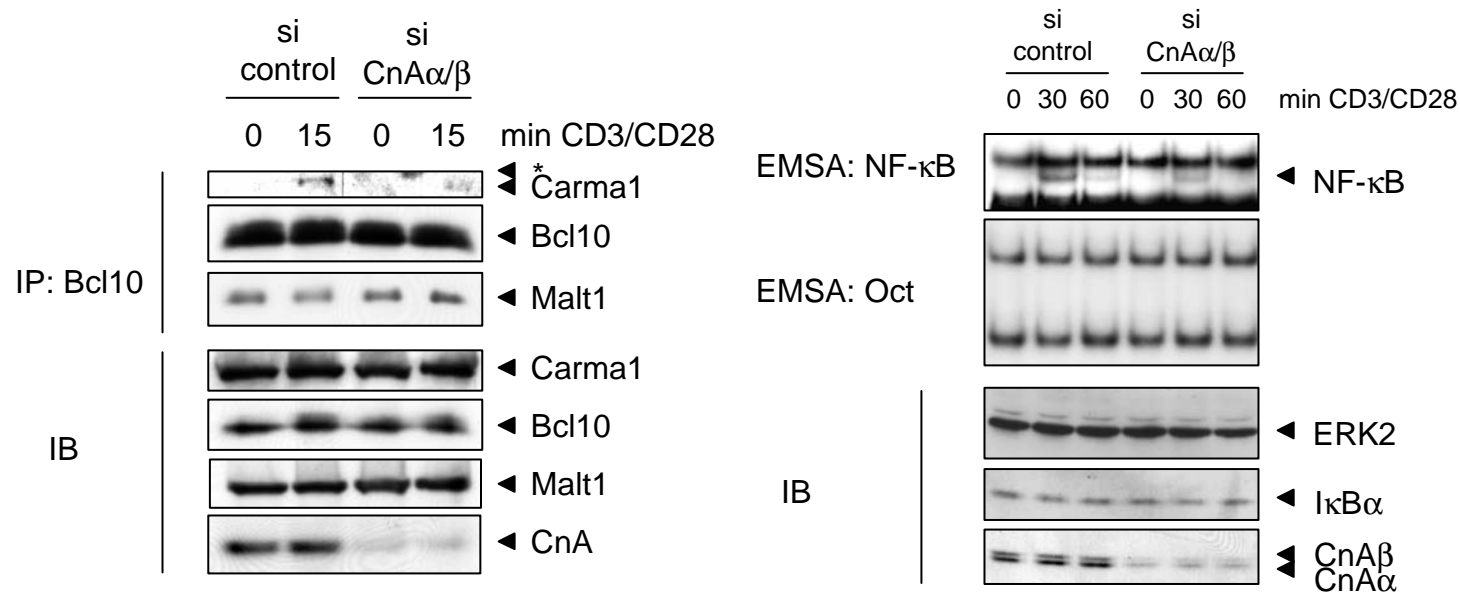

**Figure S2: Effect of siRNA mediated CnA knock down on antiCD3+CD28-induced NF- $\kappa$ B activation**

**A**, Jurkat T cells, transiently transfected either with control siRNA or with CnA-specific siRNA, were stimulated with antiCD3+CD28 antibodies as indicated prior to an anti-Bcl10 immunoprecipitation. The immunopurified protein complexes (upper part) and the lysates (lower part) were subjected to immunoblot analyses with the indicated antibodies. **B**, Jurkat T cells, transiently transfected with control siRNA and siRNA for CnA, were either left untreated or were stimulated with antiCD3+CD28 antibodies as indicated. The resulting whole cell extracts were subjected to EMSA studies using either NF- $\kappa$ B-specific or Oct-specific probes. Additional immunoblot analysis was performed with indicated antibodies to ensure the knock-down of CnA.
